# Supplementary material for: GLP-1 medications: Use and Intention in a Representative Survey of Finns
Source: Research Square preprint supplement (doi:10.21203/rs.3.rs-8016813/v1), 2025-11-14
Supplement: Supplementary file 1 [file 3058a5d0330e1770d2161309.xlsx]

## Sheet: Table 1
Table 1. Sample sociodemographic characteristics and comparison to Statistics Finland's
reports * (n=1693)
	Survey	Population data
		Statistics Finland 31.12.2024*
Gender		For the 18-years-olds and older
Men	49.0	49.2
Women	51.0	50.8
Age		The youngest age-group is 20-29 years olds
18 - 29 years	15.8	14.5
30 - 49 years	32.1	33.0
50 - 69 years	30.2	30.6
70 years or older	21.8	21.9
Region		For the 18- years-olds and older
Uusimaa region, including capital area	31.4	31.5
Southern Finland (other than Uusimaa)	22.3	20.9
Western Finland	24.3	25.0
Eastern and Northern Finland	22.0	22.6
Education		For 15 years old and older, 31.12.2023
Elementary/Comprehensive school	13.9	26.3
Vocational school	35.3	40.1 (vocational school and
Matriculation examination	14.2	matriculation exam together)
Post-secondary vocational school	7.7	9.6
Barchelor's degree from university of applied sciences	8.4	13.6 (Barchelor's degrees
Master's degree from university of applied sciences	2.4	and Master's degree form university
Barchelor's degree from university	4.7	of appliedsciences together)
Master's degree from university	12.5	11.2 (Master's degree and PhD together)
Doctoral degree	0.8
*Statistics Finland. Population structure and educational structure of population, https://stat.fi/en/statistics, 2025
