# Supplementary material for: GLP-1 medications: Use and Intention in a Representative Survey of Finns
Source: Research Square preprint supplement (doi:10.21203/rs.3.rs-8016813/v1), 2025-11-14
Supplement: Supplementary file 3 [file 689870d9b7dcd57fbaf472c6.xlsx]

## Sheet: Table 4
	Table 4. Association of GLP-1 medication use (current, past, or potential) with sociodemographics,
	BMI, and other weight-related factors (n=1693)
			Model 1		Model 2
		n	OR	95% C.I.	OR	95% C.I.
	GENDER
	Men	837	1		1
	Women	863	1.841*	1.397-2.428	1.239	0.890-1.726
	AGE
	18-29 yrs	268	1		1
	30-49 yrs	543	0.904	0.550-1.485	0.982	0.559-1.723
	50-69 yrs	512	1.286	0.793-2.085	1.857*	1.064-3.240
	70+ yrs	370	0.604	0.348-1.050	0.845	0.447-1.597
	EDUCATION
	Elementary school	236	1		1
	High shool, vocational school	838	0.901	0.595-1.355	0.930	0.579-1.495
	College of applied sciences	394	1.011	0.631-1.620	1.045	0.609-1.794
	Master's degree or PhD	225	0.651	0.353-1.199	0.583	0.295-1.153
	HOUSEHOLD YEARLY GROSS INCOME
	Under 20 000 €	333	1		1
	20 001 - 40 000 €	409	1.521	0.990-2.337	1.336	0.813-2.196
	40 001 - 70 000 €	297	1.662*	1.078-2.564	1.447	0.882-2.375
	70 001 € +	205	1.707*	1.066-2.733	1.536	0.891-2.649
	I don't want to answer	214	0.771	0.446-1.330	0.793	0.420-1.495
	BMI
	Underweight (< 18.50)	34	0.599	0.078-4.597	0.258	0.30-2.204
	Normal weight (18.50 - 24.99)	550	1		1
	Overweight (25.00 - 29.99)	609	2.844***	1.810-4.467	1.684*	1.010-2.810
	Obesity I (30.00 - 34.99)	277	9.860***	6.214-15.646	3.886***	2.266-6.666
	Obesity II (35.00-39.99)	133	12.779***	7.566-21.584	4.302***	2.285-8.100
	Obesity III (≥ 40.00)	90	19.837***	11.083-35.505	4.788***	2.338-9.803
	PAST WEIGHT LOSS ATTEMPTS DURING LIFE
	Never/No, but I try to keep my weight steady				1
	1-2 times	387			1.837	0.976-3.461
	3 + times	442			3.527***	1.952-6.374
	Constantly	345			6.433***	3.497-11.834
	TREATED UNFAIRLY OR DISCRIMINATED AGAINST BECAUSE OF THEIR WEIGHT DURING THE PAST YEAR
	No/Don't know	1306			1
	Seldom	203			1.633*	1.055-2.528
	Sometimes/Often	184			3.668***	2.293-5.686
	"I BLAME MYSELF FOR MY WEIGHT"
	Other answering options	963			1
	Fully/somewhat agree	706			2.035***	1.410-2.936
	"I AM HOPEFUL THAT THE OBESITY MEDICATIONS WILL HELP PEOPLE EFFECTIVELY LOSE WEIGHT"
	Other answering options	536			1
	Fully/somewhat agree	1157			6.167***	4.289-8.862
	“I AM CONCERNED THAT SERIOUS HEALTH RISKS MAY EMERGE FROM NEW MEDICATIONS”
	Other answering options	869			1
	Fully/somewhat agree	824			0.309***	0.220-0.436
	Nagelkerke R Square		0.268		0.496
	* p < 0.05; ** p < 0.01; *** p < .0.001
