# Supplementary material for: GLP-1 medications: Use and Intention in a Representative Survey of Finns
Source: Research Square preprint supplement (doi:10.21203/rs.3.rs-8016813/v1), 2025-11-14
Supplement: Supplementary file 4 [file af0025bcb0c07b046bc7d630.xlsx]

## Sheet: Table 3
	Table 3. Sample Characteristics by GLP-1 Use Categories, Column Frequencies (N=1 693)
			Current	Former	Interested	Not interested	Has not
		n (%)	user	user	in using	in using	heard	P-Value
	TOTAL	1693	60	34	228	936	4356
	GENDER
	Men	830 (49.0)	40.0	44.1	36.8	47.0	61.4
	Women	863 (51.0)	60.0	55.9	63.2	53.0	38.6
	Total		100.0	100.0	100.0	100.0	100.0	p<0.001
	AGE
	Mean	All: 51.64	54.45	57.29	50.37	49.26	56.73	p<0.001
	18-29 yrs	268 (15.8)	6.7	2.9	11.4	18.7	14.3
	30-49 yrs	543 (32.1)	30.0	20.6	37.7	36.2	21.4
	50-69 yrs	512 (30.2)	53.3	58.8	37.3	25.2	32.0
	70+ yrs	370 (21.9)	10.0	17.6	13.6	19.9	32.4
	Total		100.0	100.0	100.0	100.0	100.0	p<0.001
	EDUCATION
	Elementary/Comprehensive school	236 (13.9)	18.3	17.6	11.8	11.8	18.9
	High school/ Vocational school	838 (49.5)	50.0	55.9	54.8	48.2	49.0
	Barchelor degree/ Univ of Applied Sciences	394 (23.3)	25.0	26.5	24.6	23.8	20.9
	Master's degree/PhD	225 (13.3)	6.7	0.0	8.8	16.2	11.3
	Total		100.0	100.0	100.0	100.0	100.0	p<0.001
	HOUSEHOLD YEARLY GROSS INCOME
	Under 20 000 €	333 (19.7)	11.7	2.9	18.9	22.0	17.5
	20 001 - 40 000 €	409 (24.2)	26.7	44.1	24.6	22.1	26.4
	40 001 - 70 000 €	414 (24.5)	25.0	29.4	28.1	23.7	23.7
	70 001 € +	302 (17.8)	31.7	11.8	19.7	17.8	15.4
	I don't want to answer	235 (13.9)	5.0	11.8	8.8	14.3	17.0
	Total		100.0	100.0	100.0	100.0	100.0	p<0.001
	BMI
	Mean		35.42	33.72	32.68	27.03	26.52	p<0.001
	Underweight (<18.50)	34 (2.0)	0.0	2.9	0.0	2.0	3.2
	Normal weight (18.50 - 24.99)	550 (32.5)	5.0	14.7	9.2	38.8	36.3
	Overweight (25.00 - 29.99)	609 (36.0)	20.0	14.7	28.5	37.2	41.1
	Obesity I (30.00 - 34.99)	277 (16.4)	35.0	26.5	31.6	12.3	13.8
	Obesity II (35.00-39.99)	133 (7.9)	16.7	20.6	18.0	6.1	4.1
	Obesity III (≥40.00)	90 (5.3)	23.3.	20.6	12.7	3.6	1.4
	Total		100.0	100.0	100.0	100.0	100.0	p<0.001
	PAST WEIGHT LOSS ATTEMPTS DURING LIFE
	No	174 (10.3)	1.7	0.0	1.3	9.2	19.3
	No, but I try to keep my weight steady	345 (20.4)	1.7	2.9	5.7	22.1	28.3
	1-2 times in my life	387 (22.9)	3.3	11.8	16.2	26.4	22.3
	3 times of more	442 (26.1)	40.0	32.4	34.6	27.8	15.6
	Yes, constantly	345 (20.4)	53.3	52.9	42.1	14.5	14.5
	Total		100.0	100.0	100.0	100.0	100.0	p<0.001
	TREATED UNFAIRLY OR DISCRIMINATED AGAINST BECAUSE OF THEIR WEIGHT DURING THE PAST YEAR
	Never	1253 (74.0)	48.3	35.3	51.8	79.0	81.6
	Seldom	203 (12.0)	11.7	17.6	20.2	10.3	11.0
	Sometimes	153 (9.0)	25.0	32.4	19.3	7.2	3.7
	Often	31 (1.8)	10.0	5.9	3.1	1.1	1.4
	I don't know	53 (3.1)	5.0	8.8	5.7	2.6	2.3
	Total		100.0	100.0	100.0	100.0	100.0	p<0.001
	"I BLAME MYSELF FOR MY WEIGHT"
	Fully or somewhat agree	706 (41.7)	81.7	67.6	72.4	37.8	26.4
	Nor agree, not disagree	273 (16.1)	10.0	20.6	9.2	15.9	20.7
	Fully or somewhat disagree	690 (40.8)	8.3	11.8	17.5	45.1	50.3
	I don't know	24 (1.4)	0.0	0.0	0.9	1.2	2.5
	Total		100.0	100.0	100.0	100.0	100.0	p<0.001
	"I AM HOPEFUL THAT THE OBESITY MEDICATIONS WILL HELP PEOPLE EFFECTIVELY LOSE WEIGHT"
	Fully or somewhat agree	824 (48.7)	80.0	61.8	86.4	43.7	34.3
	Nor agree, not disagree	322 (19.0)	10.0	23.5	6.6	21.8	20.5
	Fully or somewhat disagree	336 (19.8)	10.0	14.7	3.5	24.3	20.7
	I don't know	211 (12.5)	0.0	0.0	3.5	10.3	24.6
	Total		100.0	100.0	100.0	100.0	100.0	p<0.001
	“I AM CONCERNED THAT SERIOUS HEALTH RISKS MAY EMERGE FROM NEW MEDICATIONS”
	Fully or somewhat agree	1157 (68.3)	50.0	70.6	54.8	74.6	64.4
	Nor agree, not disagree	224 (13.2)	16.7	11.8	18.4	11.3	14.3
	Fully or somewhat disagree	158 (9.3)	26.7	8.8	15.8	7.9	6.7
	I don't know	154 (9.1)	6.7	8.8	11.0	6.2	14.7
	Total		100.0	100.0	100.0	100.0	10.0.0	p<0.001
